# Supplementary material for: Stereocomplex formation in stereoblock copolymer networks composed of 4-armed star-shaped lactide oligomers and a 2-armed ε-caprolactone oligomer
Source: Royal Society of Chemistry journal article supplement (doi:10.1039/c5py00401b), 2015-01-01
Supplement: c5py00401b1.pdf [file c5py00401b1.pdf]

## Electronic Supplementary Information

### **Stereocomplex formation in stereoblock copolymer networks composed of 4-armed star-shaped lactide oligomers and 2-armed $\epsilon$ -caprolactone oligomer**

Mitsuhiro Shibata\*, Masaya Katoh, Hayato Takase and Ayaka Shibita

*Department of Life and Environmental Sciences, Faculty of Engineering,*

*Chiba Institute of Technology, 2-17-1, Tsudanuma, Narashino, Chiba 275-0016, Japan.*

\* Corresponding author. Tel.&Fax: +81 47 478 -423;

E-mail: [mitsuhiro.shibata@p.chibakoudai.jp](mailto:mitsuhiro.shibata@p.chibakoudai.jp) (M.Shibata);

**Table S1** Tensile properties of MH-4scLAO/2CLOs (100/0, 75/25, 50/50, 25/75 and 0/100).

| Sample               | Tensile strength (MPa) | Tensile modulus (MPa) | Elongation at break (%) | Tensile toughness (MJ m <sup>-3</sup> ) |
|----------------------|------------------------|-----------------------|-------------------------|-----------------------------------------|
| MH4LLAO              | 28.3 ± 9.2             | 2355 ± 224            | 1.8 ± 0.6               | 0.32 ± 0.20                             |
| MH4DLAO              | 39.6 ± 11.8            | 2716 ± 463            | 6.1 ± 4.3               | 1.10 ± 0.52                             |
| MH4scLAO             | 34.7 ± 10.2            | 1695 ± 169            | 2.9 ± 1.0               | 0.66 ± 0.34                             |
| MH-4scLAO/2CLO 75/25 | 13.8 ± 3.2             | 632 ± 78              | 32.6 ± 10.9             | 4.13 ± 2.01                             |
| MH-4scLAO/2CLO 50/50 | 7.1 ± 0.5              | 68.6 ± 17.5           | 142 ± 13                | 7.82 ± 0.52                             |
| MH-4scLAO/2CLO 25/75 | 8.3 ± 1.1              | 132.8 ± 32.4          | 155 ± 51                | 1.10 ± 0.93                             |
| MH2CLO               | 9.3 ± 1.3              | 103.2 ± 4.8           | 884 ± 207               | 10.9 ± 3.3                              |

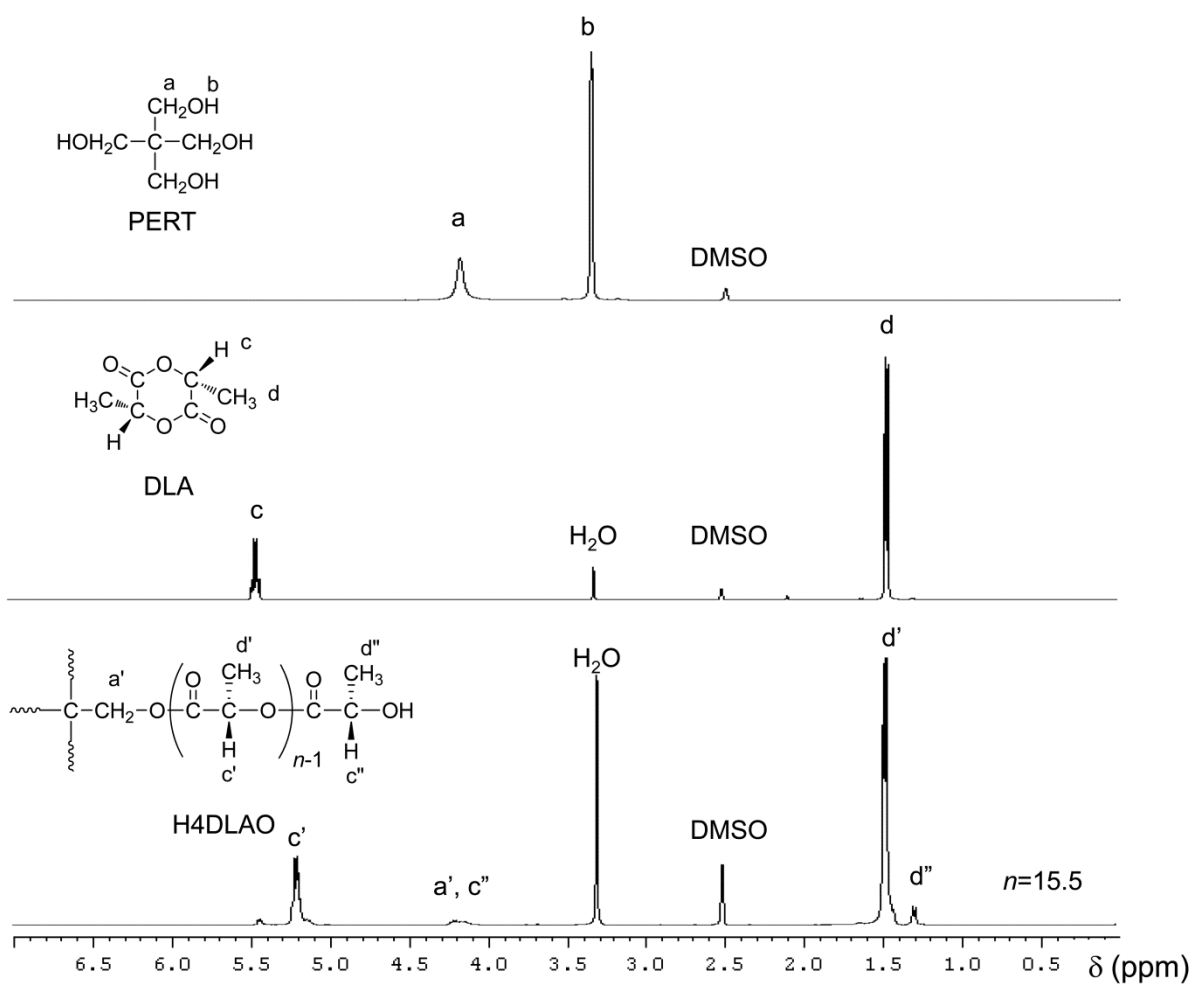

**Figure S1.** 400 MHz  $^1\text{H}$ -NMR spectrum of H4DLAO in  $\text{DMSO-}d_6$ .

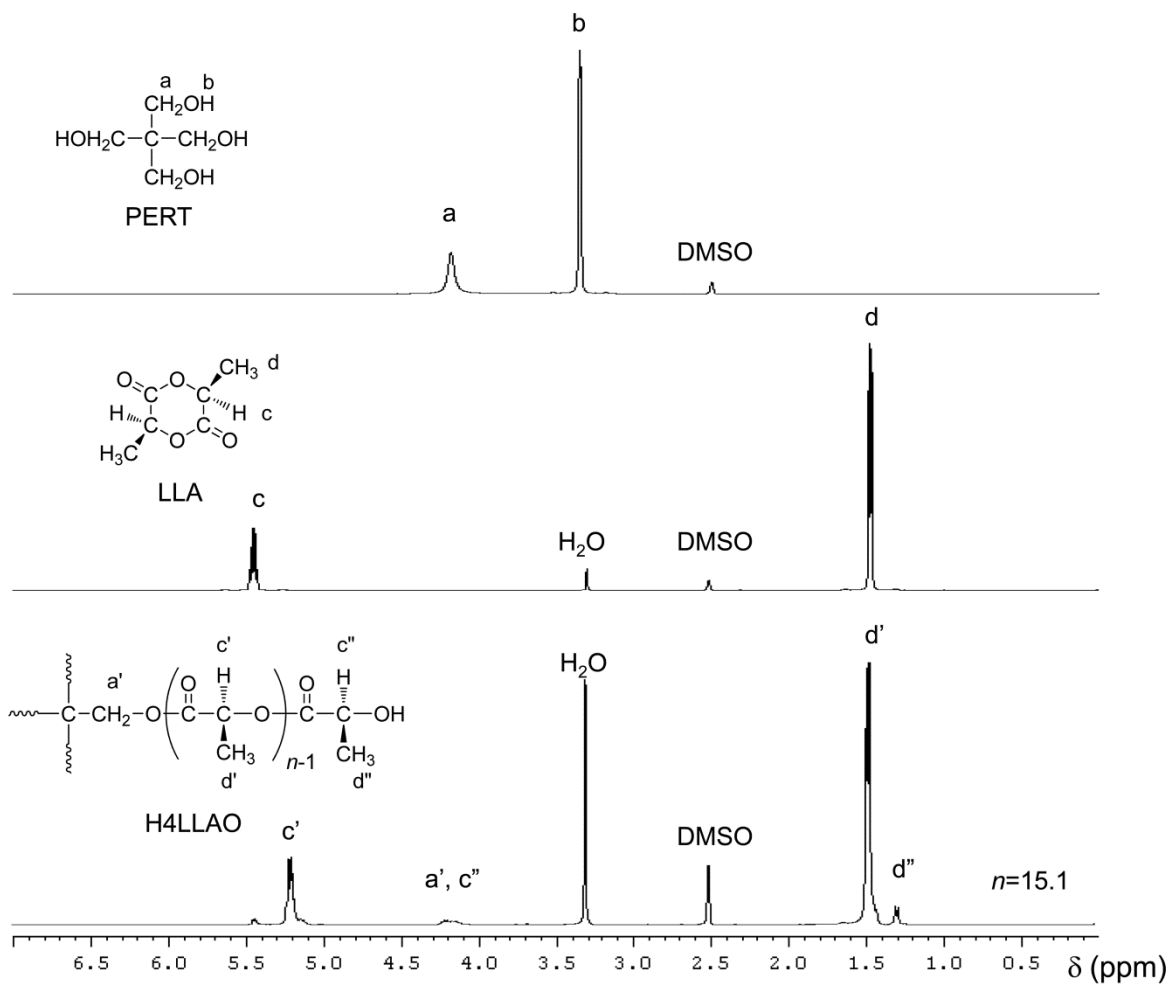

**Figure S2.**  $^1\text{H-NMR}$  spectra of PERT, DLA, and H4DLAO in  $\text{DMSO-}d_6$ .

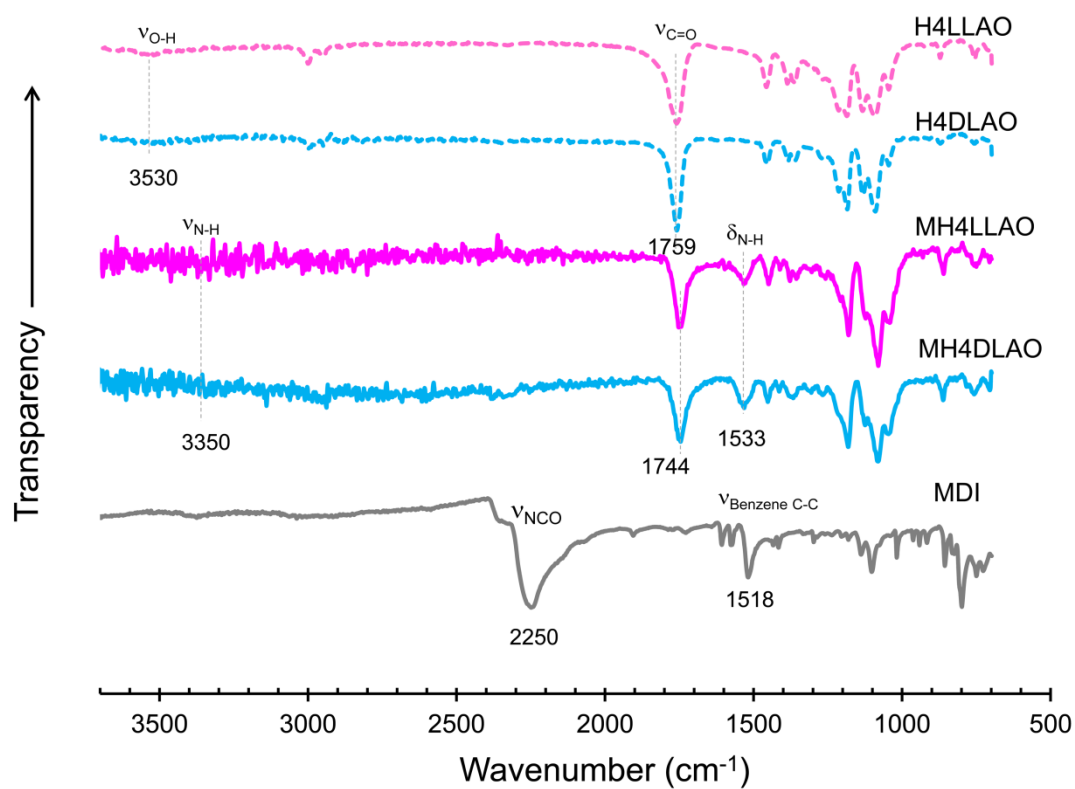

**Figure S3.** FT-IR spectra of H4LLAO, H4DLAO, MH4LLAO, MH4DLAO and MDI.

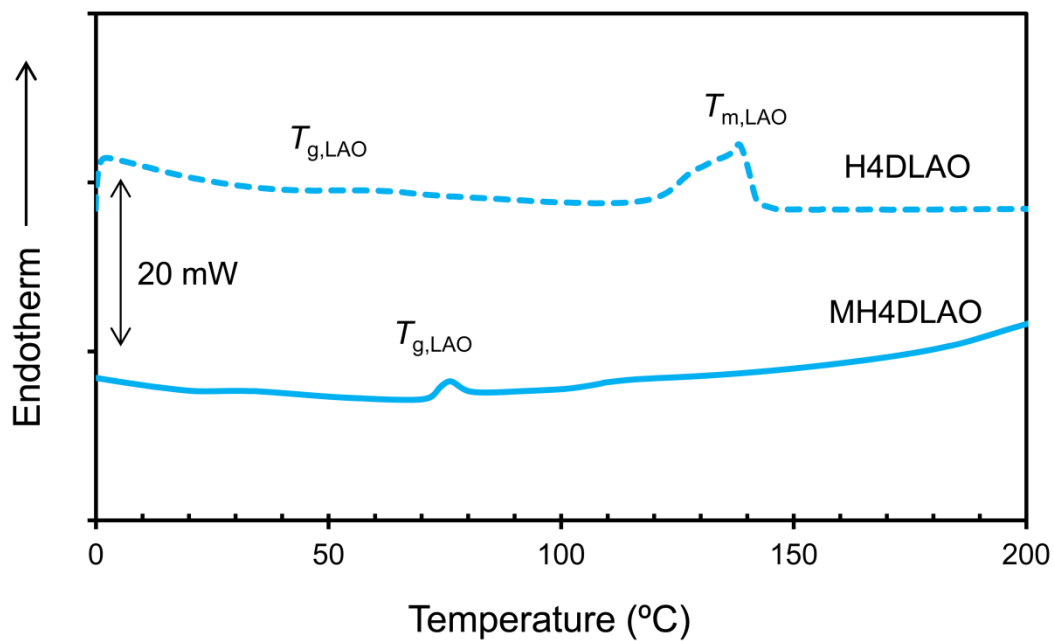

**Figure S4.** The first heating DSC curves of H4DLAO and MH4DLAO.
